# Supplementary material
Source: publisher figshare collection journal article supplement (https://frontiersin.figshare.com/ndownloader/files/14635187)
Supplement: Supplementary file [file 14635187]

*Appendix iv. Topic list for the interviews performed with the community pharmacist in the pilot study*

|                              |                                                                                                                                                                                                                              |
|------------------------------|------------------------------------------------------------------------------------------------------------------------------------------------------------------------------------------------------------------------------|
| Setting and collaboration:   | Size of the pharmacy<br>Collaboration with the GP<br>Pharmacotherapy audit meetings                                                                                                                                          |
| Medication reviews:          | Selection of patients<br>Procedure<br>Personnel involved                                                                                                                                                                     |
| Usefulness of the algorithm: | Opinion about the four criteria included in the algorithm<br>Differences between reviews performed in both groups<br>Differences in interventions<br>Differences in patients<br>Patients potentially missed by the algorithm |
| Feasibility:                 | Feasibility of collecting information for the algorithm<br>Opportunities for automatization<br>Barriers to perform review for the patients selected by the algorithm                                                         |
